# Supplementary material
Source: Springer Nature journal article supplement (https://www.springermedizin.de/resource/supplementary/13075_2014_4351_MOESM4_ESM.pdf/9696484)

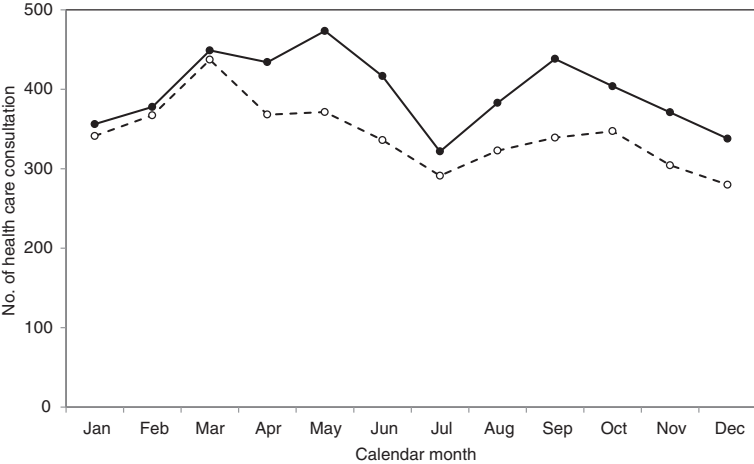

Supplement: MOESM4 [file 9696484]
